# Supplementary material for: Estimation of the Burden of Pandemic(H1N1)2009 in Developing Countries: Experience from a Tertiary Care Center in South India
Source: PLoS One. 2012 Sep 5;7(9):e41507. doi: 10.1371/journal.pone.0041507 (PMC3434194; doi:10.1371/journal.pone.0041507)
Supplement: Table S1 — Association of clinical symptoms and signs as risk factors for the outcomes of interest (in-patient admission, ICU admission and Mortality as compared to OPD admission. The symptoms of respiratory illness were not associated with increased risk of in-patient, ICU admission or mortality, but the signs of respiratory disease were associated with an increased risk. Presence of co-morbidity was associated with an increased risk of all 3 outcomes. (XLS) [file pone.0041507.s001.xls]

## Sheet: Sheet1
Table S1 Clinical Risk Factors for inpatient admission, ICU admission and Deaths compared with outpatients
	Control	Outcome 1		Outcome 2		Outcome 3
Variable@	OPD (N=1403)	IPD (N=945)	OR (95%CI)	ICU (N=102)	OR (95%CI)	Mortality (N=138)	OR (95%CI)
Fever	1287 (91.7)	847 (89.6)	0.8(0.6-1.0)	98 (96.1)	2.2(0.8-6.1)	124 (89.8)	0.8(0.4-1.4)
Sore Throat	687 (48.9)	154 (16.3)	0.2(0.2-0.3)	26 (25.5)	0.4(0.2-0.6)	32 (23.2)	0.3(0.2-0.5)
ND	934 (66.6)	456 (48.2)	0.5(0.3-0.6)	17 (16.7)	0.1(0.1-0.2)	20 (14.5)	0.1(0.1-0.2)
Cough	1174(83.7)	755 (79.9)	0.8(0.6-0.9)	63 (61.8)	0.3(0.2-0.5)	98 (71.0)	0.5(0.3-0.7)
Chills	403 (28.7)	181 (19.1)	0.6(0.5-0.7)	43 (42.1)	1.8(1.2-2.7)	42 (30.4)	1.1 (0.7-1.6)
Diarrhea	92 (6.6)	73 (7.7)	1.2(0.9-1.6)	12 (11.8)	1.9(1.0-3.6)	15 (10.9)	1.7(1.0-3.0)
Comorb. #	7(1.4)	45(28.4)	30.8	10 (58.8)	111.5	12 (35.3)	175.7
Breath.	270 (19.2)	554 (58.6)	5.9(4.8-7.3)	83 (81.4)	18.3(10.5-31.9)	115 (83.3)	20.9 (12.5-35.1)
Stridor	9 (0.6)	16 (1.7)	2.7(1.2-6.1)	1 (1.0)	1.5(0.2-12.2)	3 (2.2)	3.4 (1.0-12.8)
Air entry	70(5.0)	328 (34.7)	10.1(7.5-13.6)	36 (35.3)	10.4(6.3-17.0)	46 (33.3)	9.5 (6.1-14.9)
Crepts	57(4.1)	371(39.2)	15.2(10.9-21.2)	60 (58.8)	33.7(19.3-58.7)	76(55.1)	28.9(17.6-47.7)
Wheeze	53 (3.8)	236 (25.0)	8.5 (6.1-11.8)	28 (27.4)	9.6(5.7-16.4)	36 (26.1)	8.9 (5.5-14.6)
Br. Breathing	10 (0.7)	47 (5.0)	7.3(3.6-14.6)	17 (16.7)	27.9(11.9-65.3)	26 (18.8)	32.3(14.5-72.2)
All variables expressed as number (%). # Co-morbidity information collected only for those persons positive for influenza A
[seasonal H1N1, H3N2 or A/H1N1/09], hence sample size too small to provide an accurate CI.
ND – nasal discharge, Breath. – breathlessness, Br. Breathing – Bronchial breathing, Comorb- Comorbidity,
Air entry – Reduced air entry (breath sounds), Crepts. - crepitations
