# Supplementary material for: Estimation of the Burden of Pandemic(H1N1)2009 in Developing Countries: Experience from a Tertiary Care Center in South India
Source: PLoS One. 2012 Sep 5;7(9):e41507. doi: 10.1371/journal.pone.0041507 (PMC3434194; doi:10.1371/journal.pone.0041507)
Supplement: Table S2 — Week-wise raw numbers of total SARI admissions, A/H1N1/09 SARI admissions, A/H1N1/09 mortality and all-cause mortality seen at the hospital for the period from May 2009 to April 2010. (XLS) [file pone.0041507.s002.xls]

## Sheet: Table 2
		Table S2 Week-wise numbers of various parameters used in the correlation analysis
		Week Number	Total SARI cases	A/H1N1/09 SARI cases	A/H1N1/09 Mortality	All Cause mortality
Year 2009	Pre-pandemic period	18	12	0	0	41
		19	8	0	0	45
		20	7	0	0	35
		21	13	0	0	32
		22	10	0	0	45
		23	5	0	0	38
		24	6	0	0	40
		25	7	0	0	40
		26	6	0	0	42
		27	5	0	0	35
		28	10	0	0	43
		29	6	0	0	43
		30	7	0	0	28
	Peak-pandemic period	31	5	1	0	35
		32	14	0	0	46
		33	12	5	0	41
		34	20	7	0	32
		35	20	12	0	35
		36	53	18	5	44
		37	93	27	2	29
		38	60	15	0	26
		39	65	12	1	35
		40	47	11	1	32
		41	81	6	2	42
		42	44	4	3	44
		43	55	5	1	46
		44	42	7	1	48
		45	33	4	2	53
		46	30	1	1	51
		47	46	9	3	42
		48	35	5	0	40
		49	31	4	3	41
		50	42	7	2	40
		51	52	6	2	53
		52	33	1	1	36
Year 2010		1	25	2	1	39
		2	25	1	2	28
		3	17	0	0	33
		4	10	0	0	41
	Post-peak pandemic period	5	21	1	0	39
		6	7	0	0	34
		7	7	1	0	36
		8	6	0	0	36
		9	6	0	0	29
		10	3	0	0	36
		11	5	0	0	28
		12	8	0	0	42
		13	12	0	0	36
		14	3	0	0	40
		15	4	0	0	35
		16	8	1	1	39
		17	3	0	0	27
